# A Hand around My Finger

Lesley Silver, M.D., F.R.C.P.C.\*

A hand around my finger  
 Squeezes to hold on,  
 The light that fills your being  
 Has been there just so long.  
 The air you breathe in and out  
 So much faster than mine,  
 Your eventful life  
 Is already a lifetime.  
 Your bruised little body  
 Engaged in constant fight,  
 With the genetic injustice  
 That was your birthright.  
 If we can rise above  
 This thing our eyes see:  
 A fragile infant  
 Fighting mortality,  
 Then you can rise beyond  
 Your preset destiny;  
 Each battle that you win  
 Closer to being free.  
 The finger grasp is gone  
 And you fade back into dreams,  
 Where two legs carry you-  
 No scars and no iv's.  
 I carry on my way-  
 Patients, problems, plans;  
 But the image still persists  
 Of my finger and your hand.

\* Children's Hospital of Eastern Ontario, Ottawa, Ontario, Canada. lesleycasilver@gmail.com

Accepted for publication March 8, 2012.

Copyright © 2012, the American Society of Anesthesiologists, Inc. Lippincott Williams & Wilkins. Anesthesiology 2012; 117:1134
